# Supplementary material for: Common origin of ornithine–urea cycle in opisthokonts and stramenopiles
Source: PubMed Central journal article supplement (PMC7542463; doi:10.1038/s41598-020-73715-8), 2020-10-07
Supplement: 41598_2020_73715_MOESM1_ESM.pdf [file 41598_2020_73715_MOESM1_ESM.pdf]

Supplemental information

**Common origin of Ornithine-Urea Cycle in opisthokonts and stramenopiles.**

Aleš Horák<sup>1,2</sup>, Andrew Allen<sup>3,4</sup>, Miroslav Oborník<sup>1,2</sup>

<sup>1</sup> Biology Centre, Czech Academy of Sciences, Institute of Parasitology, Branišovská 31, 37005 České Budějovice, Czech Republic

<sup>2</sup> University of South Bohemia, Faculty of Science, Department of Molecular Biology, Branišovská 31, 37005 České Budějovice, Czech Republic

<sup>3</sup>J. Craig Venter Institute, San Diego, 10355 Science Center Drive, California 92121, USA

<sup>4</sup>Scripps Institution of Oceanography, 9500 Gilman Drive, La Jolla, California 92093, USA

Address for correspondence: [obornik@paru.cas.cz](mailto:obornik@paru.cas.cz)

**Supplemental Figure legends:**

Supplemental Figure S1. Unsimplified maximum likelihood phylogeny of Carbamoyl Phosphate Synthetase (CPS) based on the alignment of 1283 aminoacids from 171 taxa. The tree was inferred using the LG+C40 model in IQTree 1.5. Numbers at nodes represent ultrafast bootstrap support estimated from 10000 replication in IQTree under the above-specified model as well as the Bayesian Posterior Probabilities computed in Phylobayes 4.1 (details described in Methods). Only bootstrap support over 84/posterior probabilities of 0.95 and higher are shown. Dash symbol indicates the topology in one of the methods used did not meet the support values described above, d.t. stands for different topology.

Supplemental Figure S2. Unsimplified maximum likelihood phylogeny of Argininosuccinate Lyase (ASL) based on the alignment of 436 aminoacids from 94 taxa. The tree was inferred using the LG+C40 model in IQTree 1.5. Numbers at nodes represent ultrafast bootstrap support estimated from 10000 replication in IQTree under the above-specified model as well as the Bayesian Posterior probabilities computed in Phylobayes 4.1 (details described in Methods). Only bootstrap support over 84/posterior probabilities of 0.95 and higher are shown. Dash symbol indicates the topology in one of the methods used did not meet the support values described above, d.t. stands for different topology.

Supplemental Figure S3. Unsimplified maximum likelihood phylogeny of Ornithine Transcarbamoylase (OTC) based on the alignment of 269 aminoacids from 161 taxa. The tree was inferred using the LG+C40 model in IQTree 1.5. Numbers at nodes represent ultrafast bootstrap support estimated from 10000 replication in IQTree under the above-specified model as well as the Bayesian Posterior probabilities computed in Phylobayes 4.1 (details described in Methods). OTC sequences are rooted with the aspartate transcarbamoylase

(ATC), which is an OTC paralog stemming from an ancient duplication event. Only bootstrap support over 84/posterior probabilities of 0.95 and higher are shown. Dash symbol indicates the topology in one of the methods used did not meet the support values described above, d.t. stands for different topology.

Supplemental Figure S4. Unsimplified maximum likelihood phylogeny of Argininosuccinate Synthase (ASuS) based on the alignment of 374 aminoacids from 118 taxa. The tree was inferred using the LG+C40 model in IQTree 1.5. Numbers at nodes represent ultrafast bootstrap support estimated from 10000 replication in IQTree under the above-specified model as well as the Bayesian Posterior probabilities computed in Phylobayes 4.1 (details described in Methods). Only bootstrap support over 84/posterior probabilities of 0.95 and higher are shown. Dash symbol indicates the topology in one of the methods used did not meet the support values described above, d.t. stands for different topology.

Supplemental Figure S5. Unsimplified maximum likelihood phylogeny of Arginase (ARG) based on the alignment of 257 aminoacids from 114 taxa. The tree was inferred using the LG4X model in IQTree 1.5. Numbers at nodes represent ultrafast bootstrap support estimated from 10000 replication in IQTree under the above-specified model as well as the Bayesian Posterior probabilities computed in Phylobayes 4.1 (details described in Methods). ARG sequences are rooted with the agmatinase (AGM), which is an ARG paralog stemming from an ancient duplication event. Only bootstrap support over 84/posterior probabilities of 0.95 and higher are shown. Dash symbol indicates the topology in one of the methods used did not meet the support values described above, d.t. stands for different topology.

— absolute support (100/1)  
 — strong suport (>84/>0.94)

0.2

CPS

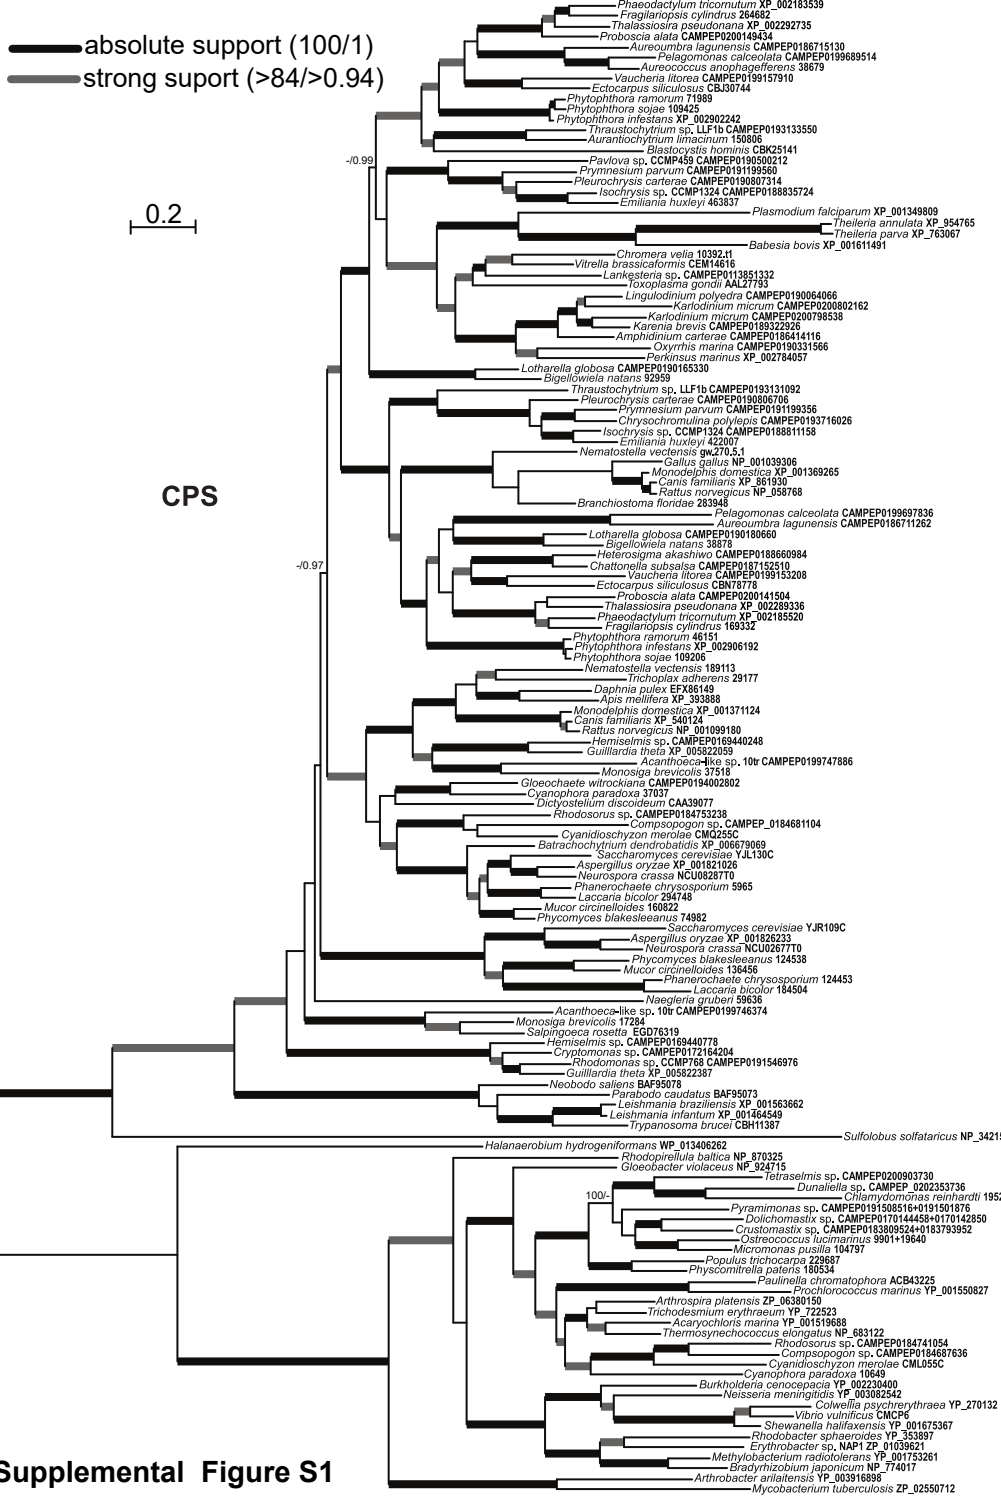

Supplemental Figure S1

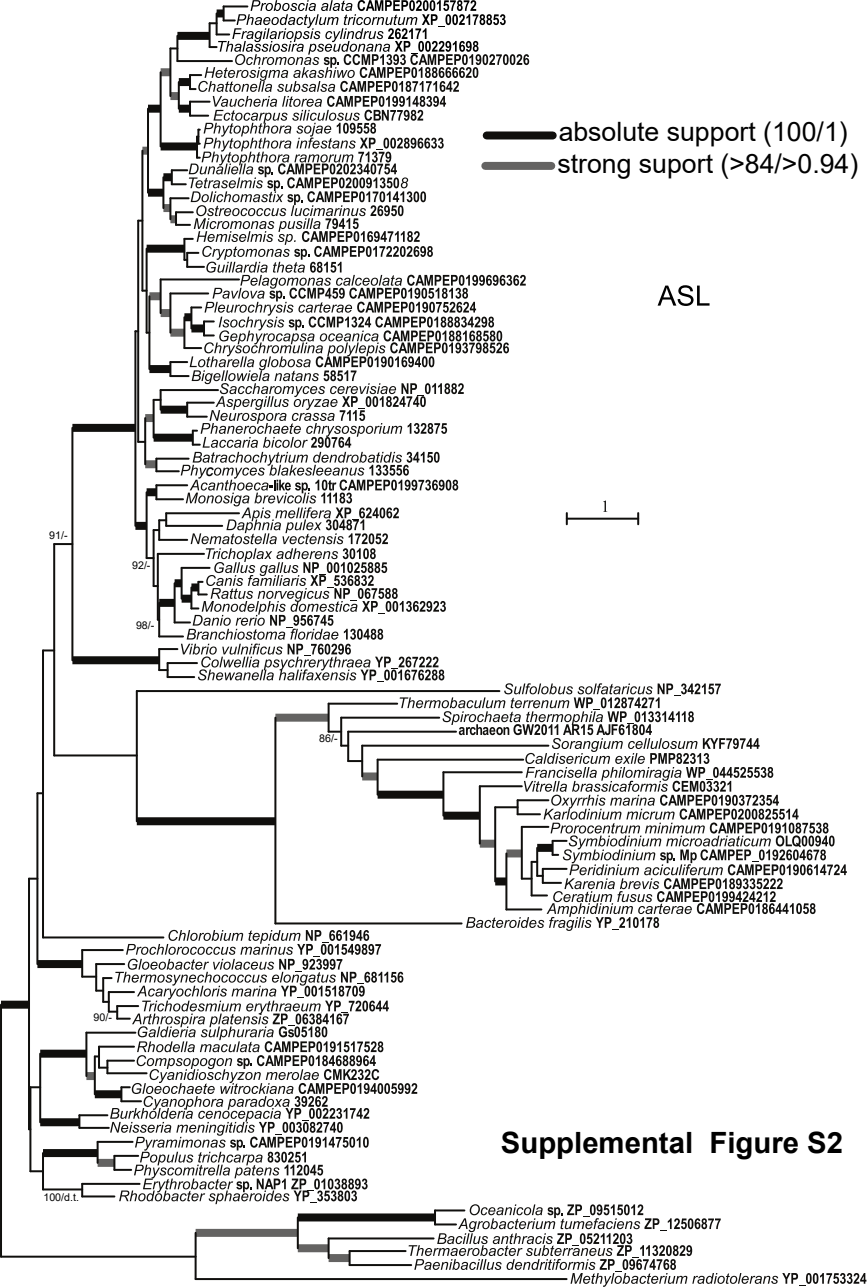



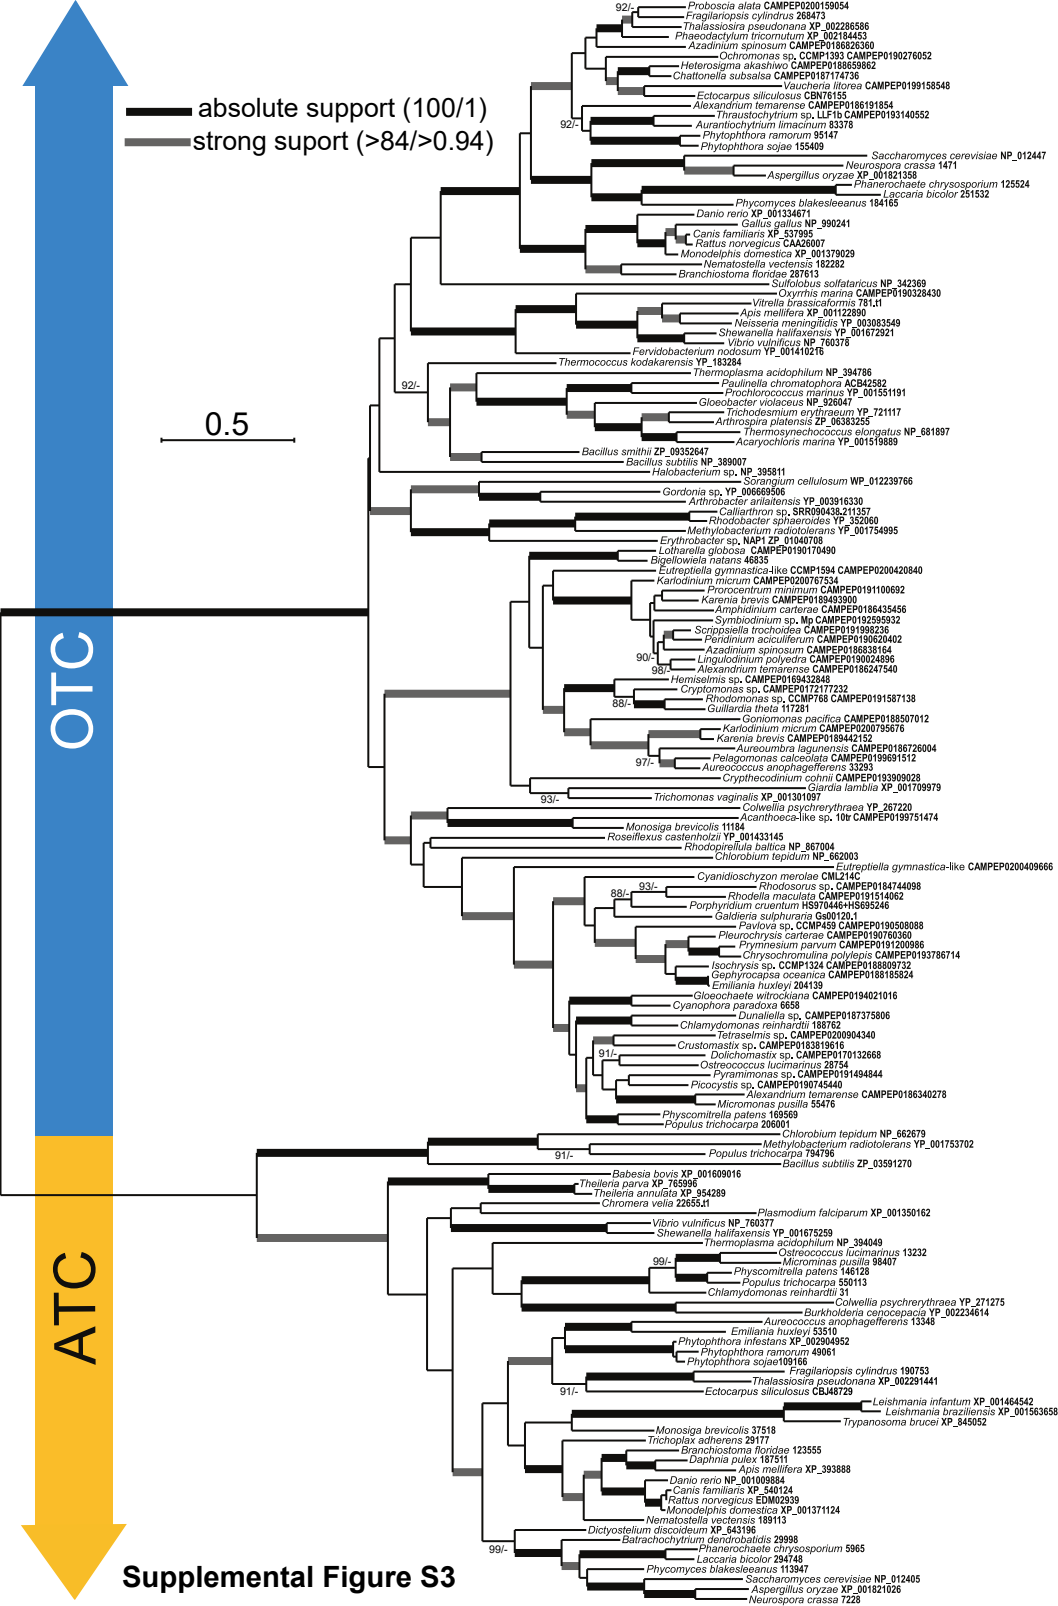

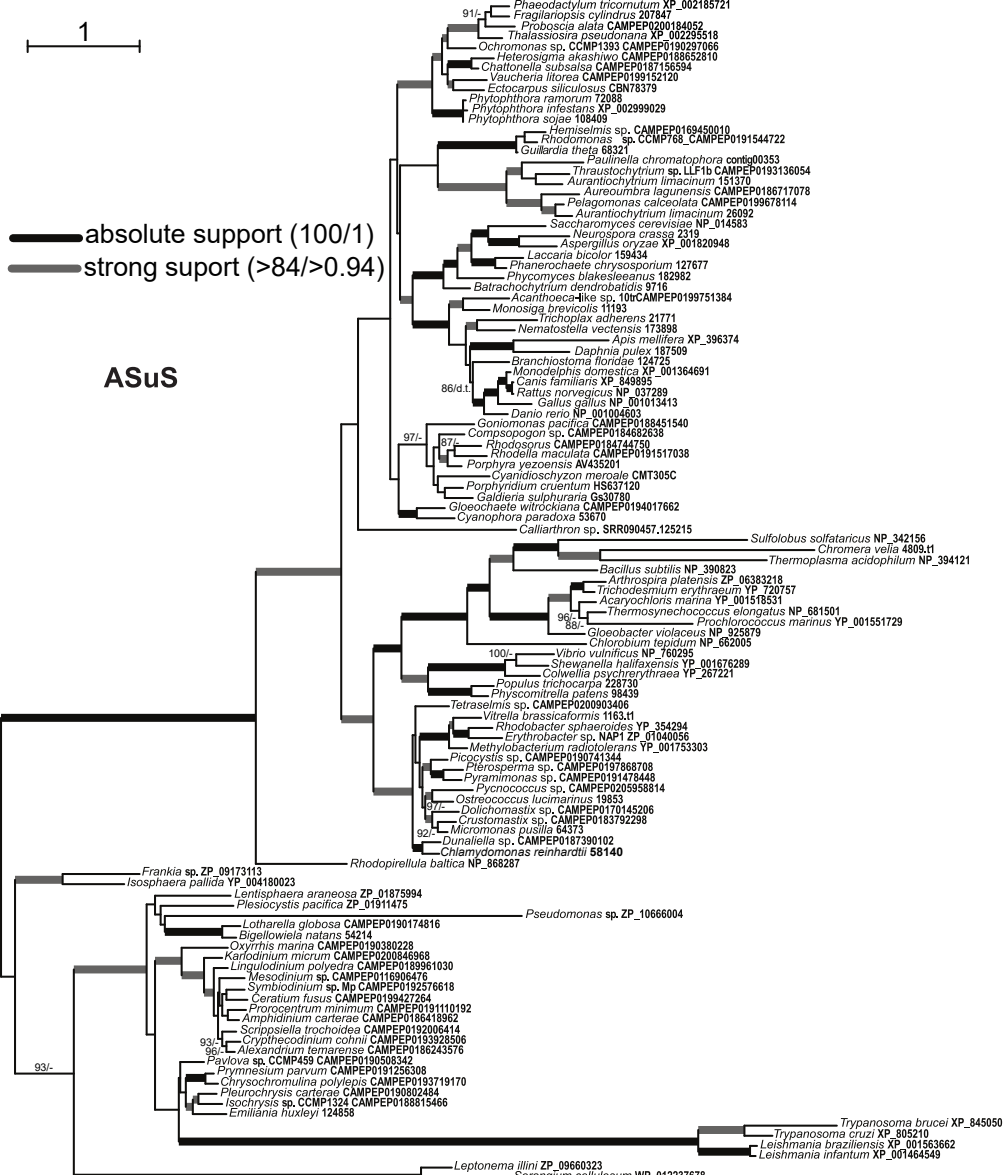

**Supplemental Figure S4**

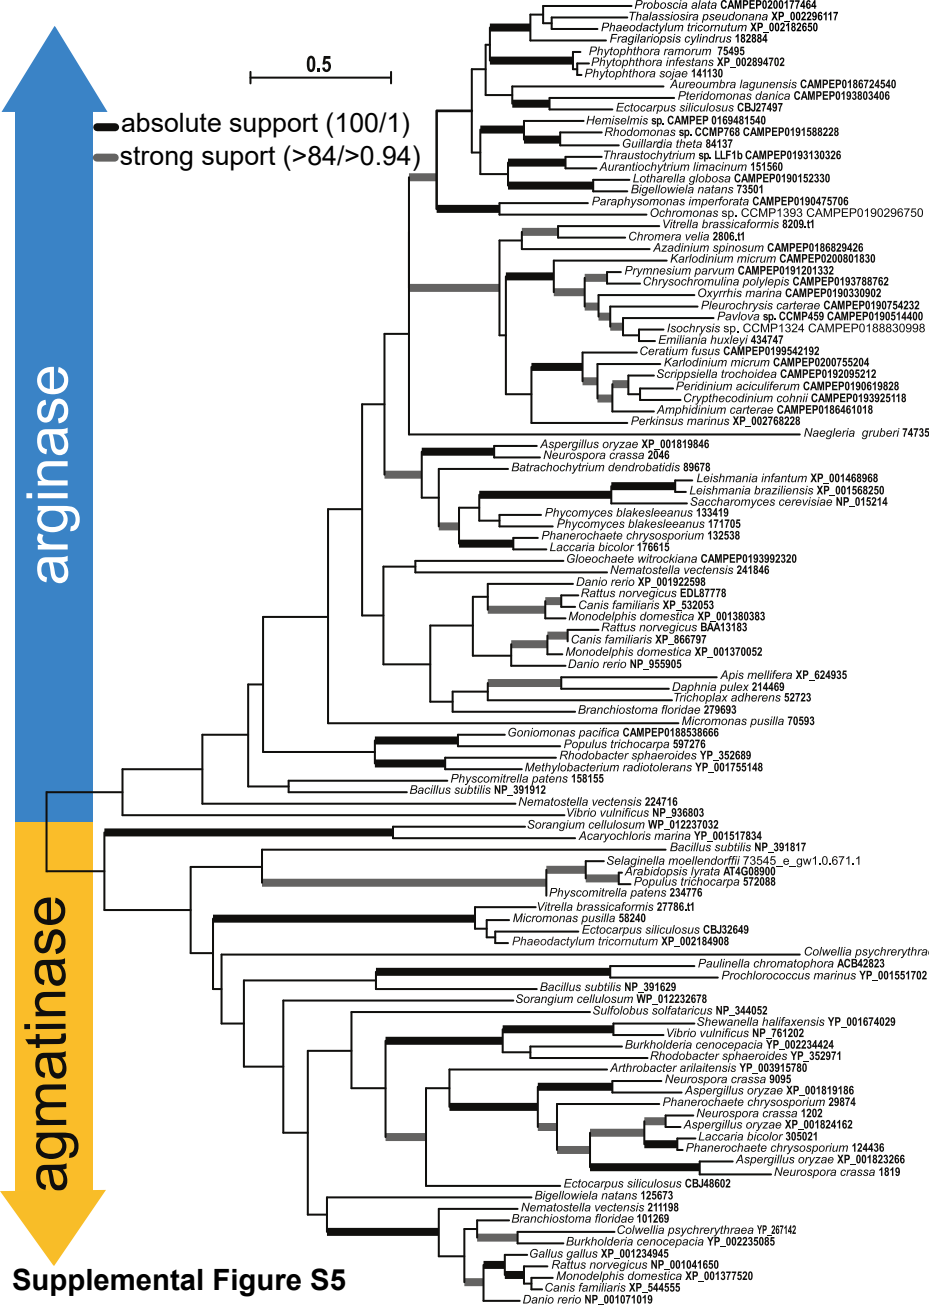

Supplemental Figure S5

**Supplemental Table S1. Accension numbers of sequences used as query for Blast search**

|             | <i>Phaeodactylum tricornutum</i> | <i>Populus trichocarpa</i> * |
|-------------|----------------------------------|------------------------------|
| <b>CPS</b>  | XP_002183539                     | 229687                       |
| <b>OTC</b>  | XP_002184453                     | 206001                       |
| <b>ASuS</b> | XP_002185721                     | 228730                       |
| <b>ASL</b>  | XP_002178853                     | 830251                       |
| <b>ARG</b>  | XP_002184453                     | 597276                       |

\* JGI genome portal database

## Supplemental Table S2.

List of taxa including sequence ID's used in phylogenetic analyses of OUC genes (Figures 2-6).

| CPS                                           | ASL                                         | OCT                                       | ASuS                                        | ARG                                         |
|-----------------------------------------------|---------------------------------------------|-------------------------------------------|---------------------------------------------|---------------------------------------------|
| Acanthoeca-like sp. 10tr CAMPEP0199746374     | Acanthoeca-like sp. 10tr CAMPEP0199736908   | Acanthoeca-like sp. 10tr CAMPEP0199751474 | Acanthoeca-like sp. 10tr CAMPEP0199751384   | Acaryochloris marina YP_001517834           |
| Acanthoeca-like sp. 10tr CAMPEP0199747886     | Acaryochloris marina YP_001518709           | Acaryochloris marina YP_001519889         | Acaryochloris marina YP_001518531           | Amphidinium carterae CAMPEP0186461018       |
| Acaryochloris marina YP_001519688             | Agrobacterium tumefaciens ZP_12506877       | Alexandrium temarense CAMPEP0186191854    | Alexandrium temarense CAMPEP0186243576      | Apis mellifera XP_624935                    |
| Amphidinium carterae CAMPEP0186414116         | Amphidinium carterae CAMPEP0186441058       | Alexandrium temarense CAMPEP0186247540    | Amphidinium carterae CAMPEP0186418962       | Arabidopsis lyrata AT4G08900                |
| Apis mellifera XP_393888                      | Apis mellifera XP_624062                    | Alexandrium temarense CAMPEP0186340278    | Apis mellifera XP_396374                    | Arthrobacter arilaitensis YP_003915780      |
| Arthrobacter arilaitensis YP_003916898        | archaeon GW2011 AR15 AJF61804               | Amphidinium carterae CAMPEP0186435456     | Arthrobacter arilaitensis YP_003917181      | Aspergillus oryzae XP_001819186             |
| Arthrospira platensis ZP_06380150             | Arthrospira platensis ZP_06384167           | Apis mellifera XP_001122890               | Arthrospira platensis ZP_06383218           | Aspergillus oryzae XP_001823266             |
| Aspergillus oryzae XP_001821026               | Aspergillus oryzae XP_001824740             | Apis mellifera XP_393888                  | Aurantiochytrium limacinum 26092            | Aspergillus oryzae XP_001824162             |
| Aspergillus oryzae XP_001826233               | Bacillus anthracis ZP_05211203              | Arthrobacter arilaitensis YP_003916330    | Aureococcus anophagefferens 151370          | Aspergillus_oryzae XP_001819846             |
| Aurantiochytrium limacinum 150806             | Bacteroides fragilis YP_210178              | Arthrospira platensis ZP_06383255         | Aureoumbra lagunensis CAMPEP0186717078      | Aurantiochytrium limacinum 151560           |
| Aureococcus anophagefferens 38679             | Batrachochytrium dendrobatidis 34150        | Aspergillus oryzae XP_001821026           | Bacillus subtilis NP_390823                 | Aureoumbra lagunensis CAMPEP0186724540      |
| Aureoumbra lagunensis CAMPEP0186711262        | Bigellowiella natans 58517                  | Aspergillus oryzae XP_001821358           | Batrachochytrium dendrobatidis 9716         | Azadinium spinosum CAMPEP0186829426         |
| Aureoumbra lagunensis CAMPEP0186715130        | Branchiostoma floridae 130488               | Aurantiochytrium limacinum 83378          | Bigellowiella natans 54214                  | Bacillus subtilis NP_391629                 |
| Babesia bovis XP_001611491                    | Burkholderia cenocepacia YP_002231742       | Aureococcus anophagefferens 13348         | Branchiostoma floridae 124725               | Bacillus subtilis NP_391817                 |
| Batrachochytrium dendrobatidis XP_006679069   | Caldisericum exile PMP82313                 | Aureococcus anophagefferens 33293         | Burkholderia cenocepacia YP_002233369       | Bacillus subtilis NP_391912                 |
| Bigellowiella natans 38878                    | Canis familiaris XP_536832                  | Aureoumbra lagunensis CAMPEP0186726004    | Calliarthron sp. SRR090457.125215           | Batrachochytrium dendrobatidis 89678        |
| Bigellowiella natans 92959                    | Ceratium fuscum CAMPEP0199424212            | Azadinium spinosum CAMPEP0186826360       | Canis familiaris XP_849895                  | Bigellowiella natans 125673                 |
| Blastocystis hominis CBK25141                 | Colwellia psychrerythraea YP_267222         | Azadinium spinosum CAMPEP0186838164       | Ceratium fuscum CAMPEP0199427264            | Bigellowiella natans 73501                  |
| Bradyrhizobium japonicum NP_774017            | Compsopogon sp. CAMPEP0184688964            | Babesia bovis XP_001609016                | Colwellia psychrerythraea YP_267221         | Branchiostoma floridae 101269               |
| Branchiostoma floridae 283948                 | Cryptomonas sp. CAMPEP0172202698            | Bacillus smithii ZP_09352647              | Compsopogon sp. CAMPEP0184682638            | Branchiostoma floridae 279693               |
| Burkholderia cenocepacia YP_002230400         | Cyanidioschyzon merolae CMK232C             | Bacillus subtilis NP_389007               | Crustomastix sp. CAMPEP0183792298           | Burkholderia cenocepacia YP_002234424       |
| Canis familiaris XP_540124                    | Cyanophora paradoxa 39262                   | Bacillus subtilis ZP_03591270             | Cryptothecodinium cohnii CAMPEP0193928506   | Burkholderia cenocepacia YP_002235085       |
| Canis familiaris XP_861930                    | Danio rerio NP_956745                       | Batrachochytrium dendrobatidis 29998      | Cyanidioschyzon merolae CMT305C             | Canis familiaris XP_532053                  |
| Colwellia psychrerythraea YP_270132           | Daphnia pulex 304871                        | Bigellowiella natans 46835                | Cyanophora paradoxa 53670                   | Canis familiaris XP_544555                  |
| Compsopogon sp. CAMPEP_0184681104             | Dolichomastix sp. CAMPEP0170141300          | Branchiostoma floridae 123555             | Danio rerio NP_001004603                    | Canis familiaris XP_866797                  |
| Compsopogon sp. CAMPEP0184687636              | Dunaliella sp. CAMPEP0202340754             | Branchiostoma floridae 287613             | Daphnia pulex 187509                        | Ceratium fuscum CAMPEP0199542192            |
| Crustomastix sp. CAMPEP0183809524+0183793952  | Ectocarpus siliculosus CBN77982             | Burkholderia cenocepacia YP_002234614     | Dolichomastix sp. CAMPEP0170145206          | Colwellia psychrerythraea YP_267142         |
| Cryptomonas sp. CAMPEP0172164204              | Erythrobacter sp. NAP1 ZP_01038893          | Calliarthron sp. SRR090438.211357         | Dunaliella sp. CAMPEP0187390102             | Colwellia psychrerythraea YP_267939         |
| Cyanidioschyzon merolae CML055C               | Fragilariopsis cylindrus 262171             | Canis familiaris XP_537995                | Ectocarpus siliculosus CBN78379             | Cryptothecodinium cohnii CAMPEP0193925118   |
| Cyanidioschyzon merolae CMQ255C               | Francisella philomiragia WP_044525538       | Canis familiaris XP_540124                | Emiliania huxleyi 124858                    | Danio rerio NP_001071019                    |
| Cyanophora paradoxa 10649                     | Galdieria sulphuraria Gs05180               | Colwellia psychrerythraea YP_267220       | Erythrobacter sp. NAP1 ZP_01040056          | Danio rerio NP_955905                       |
| Cyanophora paradoxa 37037                     | Gallus gallus NP_001025885                  | Colwellia psychrerythraea YP_271275       | Fragilariopsis cylindrus 207847             | Danio rerio XP_001922598                    |
| Daphnia pulex EFX86149                        | Gephyrocapsa oceanica CAMPEP0188168580      | Crustomastix sp. CAMPEP0183819616         | Frankia sp. ZP_09173113                     | Daphnia pulex 214469                        |
| Dictyostelium discoideum CAA39077             | Gloeobacter violaceus NP_923997             | Cryptothecodinium cohnii CAMPEP0193909028 | Galdieria sulphuraria Gs30780               | Ectocarpus siliculosus CBJ27497             |
| Dolichomastix sp. CAMPEP0170144458+0170142850 | Gloeochaete wtrockiana CAMPEP0194005992     | Cryptomonas sp. CAMPEP0172177232          | Gallus gallus NP_001013413                  | Ectocarpus siliculosus CBJ48602             |
| Dunaliella sp. CAMPEP_0202353736              | Guillardia theta 68151                      | Cyanidioschyzon merolae CML214C           | Gloeobacter violaceus NP_925879             | Emiliania huxleyi 434747                    |
| Ectocarpus siliculosus CBJ30744               | Hemiselmis sp. CAMPEP0169471182             | Cyanophora paradoxa 6658                  | Gloeochaete wtrockiana CAMPEP0194017662     | Fragilariopsis cylindrus 182884             |
| Ectocarpus siliculosus CBN78778               | Heterosigma akashiwo CAMPEP0188666620       | Danio rerio NP_001009884                  | Goniomonas pacifica CAMPEP0188451540        | Gallus gallus XP_001234945                  |
| Emiliania huxleyi 422007                      | Chattonella subsalsa CAMPEP0187171642       | Danio rerio XP_001334671                  | Guillardia theta 68321                      | Gloeochaete wtrockiana CAMPEP0193992320     |
| Emiliania huxleyi 463837                      | Chlorobium tepidum NP_661946                | Daphnia pulex 187511                      | Hemiselmis sp. CAMPEP0169450010             | Goniomonas pacifica CAMPEP0188538666        |
| Erythrobacter sp. NAP1 ZP_01039621            | Chrysochromulina polylepis CAMPEP0193798526 | Dictyostelium discoideum XP_643196        | Heterosigma akashiwo CAMPEP0188652810       | Guillardia theta 84137                      |
| Fragilariopsis cylindrus 169332               | Isochrysis sp. CCMP1324 CAMPEP0188834298    | Dolichomastix sp. CAMPEP0170132668        | Chattonella subsalsa CAMPEP0187156594       | Hemiselmis sp. CAMPEP_0169481540            |
| Fragilariopsis cylindrus 264682               | Karenia brevis CAMPEP0189335222             | Dunaliella sp. CAMPEP0187375806           | Chlamydomonas reinhardtii 458140            | Chromera velia 2806.t1                      |
| Gallus gallus NP_001039306                    | Karlodinium micrum CAMPEP0200825514         | Ectocarpus siliculosus CBJ48729           | Chlorobium tepidum NP_662005                | Chrysochromulina polylepis CAMPEP0193788762 |
| Gloeobacter violaceus NP_924715               | Laccaria bicolor 290764                     | Ectocarpus siliculosus CBN76155           | Chromera velia 4809.t1                      | Isochrysis sp. CCMP1324 CAMPEP0188830998    |
| Gloeochaete wtrockiana CAMPEP0194002802       | Lotharella globosa CAMPEP0190169400         | Emiliania huxleyi 204139                  | Chrysochromulina polylepis CAMPEP0193719170 |                                             |

|                                             |                                             |                                                     |                                                       |                                             |
|---------------------------------------------|---------------------------------------------|-----------------------------------------------------|-------------------------------------------------------|---------------------------------------------|
| Guillardia theta XP_005822059               | Methylobacterium radiotolerans YP_001753324 | Emiliania huxleyi 53510                             | Isochrysa sp. CCMP1324 CAMPEP0188815466               | Karlodinium micrum CAMPEP0200755204         |
| Guillardia theta XP_005822387               | Micromonas pusilla 79415                    | Erythrobaacter sp. NAP1_ZP_01040708                 | Isochrysa pallida YP_004180023                        | Karlodinium micrum CAMPEP0200801830         |
| Halanaerobium hydrogeniformans WP_013406262 | Monodelphis domestica XP_001362923          | Eutreptiella gymnastica-like CAMPEP0200409666       | Karlodinium micrum CAMPEP0200846968                   | Laccaria bicolor 176615                     |
| Hemiselmis sp. CAMPEP0169440248             | Monosiga brevicolis 11183                   | Eutreptiella gymnastica-like CCMP1594 CAMPEP0200420 | Laccaria bicolor 159434                               | Laccaria bicolor 305021                     |
| Hemiselmis sp. CAMPEP0169440778             | Neisseria meningitidis YP_003082740         | Fervidobacterium nodosum YP_001410216               | Leishmania braziliensis XP_001563662                  | Leishmania braziliensis XP_001568250        |
| Heterosigma akashiwo CAMPEP0188660984       | Nematostella vectensis 172052               | Fragilariopsis cylindrus 190753                     | Leishmania infantum XP_001464549                      | Leishmania infantum XP_001468968            |
| Chattonella subsalsa CAMPEP0187152510       | Neurospora crassa 7115                      | Fragilariopsis cylindrus 268473                     | Lentisphaera a raneosa ZP_01875994                    | Lotharella globosa CAMPEP0190152330         |
| Chlamydomonas reinhardtii 195255            | Oceanicola sp. ZP_09515012                  | Galdieria sulphuraria Gs00120.1                     | Leptonema illini ZP_09660323                          | Methylobacterium radiotolerans YP_001755148 |
| Chromera velia 10392.t1                     | Ochromonas sp. CCMP1393 CAMPEP0190270026    | Gallus gallus NP_990241                             | Lingulodinium polyedra CAMPEP0189961030               | Micromonas pusilla 58240                    |
| Chrysochromulina polylepis CAMPEP0193716026 | Ostreococcus lucimarinus 26950              | Gephyrocapsa oceanica CAMPEP0188185824              | Lotharella globosa CAMPEP0190174816                   | Micromonas pusilla 70593                    |
| Isochrysis sp. CCMP1324 CAMPEP0188811158    | Oxyrrhis marina CAMPEP0190372354            | Giardia lamblia XP_001709979                        | Mesodinium sp. CAMPEP0116906476                       | Monodelphis domestica XP_001370052          |
| Isochrysis sp. CCMP1324 CAMPEP0188835724    | Paenibacillus dendritiformis ZP_09674768    | Gloeobacter violaceus NP_926047                     | Methylobacterium radiotolerans YP_001753303           | Monodelphis domestica XP_001377520          |
| Karenia brevis CAMPEP0189322926             | Pavlova sp. CCMP459 CAMPEP0190518138        | Gloeochaete wittrockiana CAMPEP0194021016           | Micromonas pusilla 64373                              | Monodelphis domestica XP_001380383          |
| Karlodinium micrum CAMPEP0200798538         | Pelagomonas calceolata CAMPEP0199696362     | Goniomonas pacifica CAMPEP0188507012                | Monodelphis domestica XP_001364691                    | Naegleria gruberi 74735                     |
| Karlodinium micrum CAMPEP0200802162         | Peridinium aciculiferum CAMPEP0190614724    | Gordonia sp. YP_006669506                           | Monosiga brevicolis 11193                             | Nematostella vectensis 211198               |
| Laccaria bicolor 184504                     | Phaeodactylum tricornutum XP_002178853      | Guillardia theta 117281                             | Neisseria meningitidis YP_003082294                   | Nematostella vectensis 224716               |
| Laccaria bicolor 294748                     | Phanerochaete chrysosporium 132875          | Halobacterium sp. NP_395811                         | Nematostella vectensis 173898                         | Nematostella vectensis 241846               |
| Lankasteria sp. CAMPEP0113851332            | Phykomyces blakesleeanus 133556             | Hemiselmis sp. CAMPEP0169432848                     | Neurospora crassa 2319 Aspergillus oryzae XP_00182094 | Neurospora crassa 1202                      |
| Leishmania braziliensis XP_001563662        | Physcomitrella patens 112045                | Heterosigma akashiwo CAMPEP0188659862               | Ochromonas sp. CCMP1393 CAMPEP0190297066              | Neurospora crassa 1819                      |
| Leishmania infantum XP_001464549            | Phytophthora infestans XP_002896633         | Chattonella subsalsa CAMPEP0187174736               | Ostreococcus lucimarinus 19853                        | Neurospora crassa 2046                      |
| Lingulodinium polyedra CAMPEP0190064066     | Phytophthora ramorum 71379                  | Chlamydomonas reinhardtii 188762                    | Oxyrrhis marina CAMPEP0190380228                      | Neurospora crassa 9095                      |
| Lotharella globosa CAMPEP0190165330         | Phytophthora sojae 109558                   | Chlamydomonas reinhardtii 31                        | Paulinella chromatophora contig00353                  | Ochromonas sp. CCMP1393 CAMPEP0190296750    |
| Lotharella globosa CAMPEP0190180660         | Pleurochrysis carterae CAMPEP0190752624     | Chlorobium tepidum NP_662003                        | Pavlova sp. CCMP459 CAMPEP0190508342                  | Oxyrrhis marina CAMPEP0190330902            |
| Methylobacterium radiotolerans YP_001753261 | Populus trichocarpa 830251                  | Chlorobium tepidum NP_662679                        | Pelagomonas calceolata CAMPEP0199678114               | Paraphysomonas imperforata CAMPEP0190475706 |
| Micromonas pusilla 104797                   | Proboscia alata CAMPEP0200157872            | Chromera velia 22655.t1                             | Phaeodactylum tricornutum XP_002185721                | Paulinella chromatophora ACB42823           |
| Monodelphis domestica XP_001369265          | Prochlorococcus marinus YP_001549897        | Chrysochromulina polylepis CAMPEP0193786714         | Phanerochaete chrysosporium 127677                    | Pavlova sp. CCMP459 CAMPEP0190514400        |
| Monodelphis domestica XP_0013717124         | Prorocentrum minimum CAMPEP0191087538       | Isochrysis sp. CCMP1324 CAMPEP0188809732            | Phycomyces blakesleeanus 182982                       | Peridinium aciculiferum CAMPEP0190619828    |
| Monosiga brevicolis 17284                   | Pyramimonas sp. CAMPEP0191475010            | Karenia brevis CAMPEP0189442152                     | Physcomitrella patens 98439                           | Perkinsus marinus XP_002768228              |
| Monosiga brevicolis 37518                   | Rattus norvegicus NP_067588                 | Karenia brevis CAMPEP0189493900                     | Phytophthora infestans XP_002999029                   | Phaeodactylum tricornutum XP_002182650      |
| Mucor circinelloides 136456                 | Rhodella maculata CAMPEP0191517528          | Karlodinium micrum CAMPEP0200767534                 | Phytophthora ramorum 72088                            | Phaeodactylum tricornutum XP_002184908      |
| Mucor circinelloides 160822                 | Rhodobacter sphaeroides YP_353803           | Karlodinium micrum CAMPEP0200795676                 | Phytophthora sojae 108409                             | Phanerochaete chrysosporium 124436          |
| Mycobacterium tuberculosis ZP_02550712      | Saccharomyces cerevisiae NP_011882          | Laccaria bicolor 251532                             | Picocystis sp. CAMPEP0190741344                       | Phanerochaete chrysosporium 132538          |
| Naegleria gruberi 59636                     | Shewanella halifaxensis YP_001676288        | Laccaria bicolor 294748                             | Plesiocystis pacifica ZP_01911475                     | Phanerochaete chrysosporium 29874           |
| Neisseria meningitidis YP_003082542         | Sorangium cellulosum KYF79744               | Leishmania braziliensis XP_001563658                | Pleurochrysis carterae CAMPEP0190802484               | Phycomyces blakesleeanus 133419             |
| Nematostella vectensis 189113               | Spirochaeta thermophila WP_013314118        | Leishmania infantum XP_001464542                    | Pleurochrysis carterae CAMPEP0190802484               | Phycomyces blakesleeanus 171705             |
| Nematostella vectensis gw.270.5.1           | Sulfolobus solfataricus NP_342157           | Lingulodinium polyedra CAMPEP0190024896             | Populus trichocarpa 579188                            | Physcomitrella patens 158155                |
| Neobodo saliens BAF95078                    | Symbiodinium microadriaticum OLQ00940       | Lotharella globosa CAMPEP0190170490                 | Porphyra yezoensis AV435201                           | Physcomitrella patens 234776                |
| Neurospora crassa NCU0267770                | Symbiodinium sp. Mp CAMPEP_0192604678       | Methylobacterium radiotolerans YP_001753702         | Porphyridium cruentum HS637120                        | Phytophthora infestans XP_002894702         |
| Neurospora crassa NCU0828770                | Tetraselmis sp. CAMPEP0200913508            | Methylobacterium radiotolerans YP_001754995         | Proboscia alata CAMPEP0200184052                      | Phytophthora ramorum 75495                  |
| Ostreococcus lucimarinus 9901+19640         | Thalassiosira pseudonana XP_002291698       | Micromonas pusilla 98407                            | Prochlorococcus marinus YP_001551729                  | Phytophthora sojae 141130                   |
| Oxyrrhis marina CAMPEP0190331566            | Thermaerobacter subterraneus ZP_11320829    | Micromonas pusilla 55476                            | Prorocentrum minimum CAMPEP0191110192                 | Pleurochrysis carterae CAMPEP0190754232     |
| Parabodo caudatus BAF95073                  | Thermobaculum terrenum WP_012874271         | Monodelphis domestica XP_001371124                  | Prymnesium parvum CAMPEP0191256308                    | Populus trichocarpa 572088                  |
| Paulinella chromatophora ACB43225           | Thermosynechococcus elongatus NP_681156     | Monodelphis domestica XP_001379029                  | Pseudomonas sp. ZP_10666004                           | Populus trichocarpa 597276                  |
| Pavlova sp. CCMP459 CAMPEP0190500212        | Trichodesmium erythraeum YP_720644          | Monosiga brevicolis 11184                           | Pterosperma sp. CAMPEP0197868708                      | Proboscia alata CAMPEP0200177464            |
| Pelagomonas calceolata CAMPEP0199689514     | Trichoplax adherens 30108                   | Monosiga brevicolis 37518                           | Pycnococcus sp. CAMPEP0205958814                      | Prochlorococcus marinus YP_001551702        |
| Pelagomonas calceolata CAMPEP0199697836     | Vaucheria litorea CAMPEP0199148394          | Neisseria meningitidis YP_003083549                 | Pyramimonas sp. CAMPEP0191478448                      | Prymnesium parvum CAMPEP0191201332          |
| Perkinsus marinus XP_002784057              | Vibrio vulnificus NP_760296                 | Nematostella vectensis 182282                       | Rattus norvegicus NP_037289                           | Pteridomonas danica CAMPEP0193803406        |
| Phaeodactylum tricornutum XP_002183539      | Vitrella brassicaformis CEM03321            | Nematostella vectensis 189113                       | Rhodella maculata CAMPEP0191517038                    | Rattus norvegicus BAA13183                  |
| Phaeodactylum tricornutum XP_002185520      |                                             | Neurospora crassa 1471                              | Rhodobacter sphaeroides YP_354294                     | Rattus norvegicus EDL87778                  |
| Phanerochaete chrysosporium 124453          |                                             | Neurospora crassa 7228                              | Rhodomonas sp. CCMP768_CAMPEP0191544722               | Rattus norvegicus NP_001041650              |

Phanerochaete chrysosporium 5965  
Phycomyces blakesleeanus 124538  
Phycomyces blakesleeanus 74982  
Physcomitrella patens 180534  
Phytophthora infestans XP\_002902242  
Phytophthora infestans XP\_002906192  
Phytophthora ramorum 46151  
Phytophthora ramorum 71989  
Phytophthora sojae 109206  
Phytophthora sojae 109425  
Plasmodium falciparum XP\_001349809  
Pleurochrysis carterae CAMPEP0190806706  
Pleurochrysis carterae CAMPEP0190807314  
Populus trichocarpa 229687  
Proboscia alata CAMPEP0200141504  
Proboscia alata CAMPEP0200149434  
Prochlorococcus marinus YP\_001550827  
Prymnesium parvum CAMPEP0191199356  
Prymnesium parvum CAMPEP0191199560  
Pyramimonas sp. CAMPEP0191508516+0191501876  
Rattus norvegicus NP\_001099180  
Rattus norvegicus NP\_058768  
Rhodobacter sphaeroides YP\_353897  
Rhodomonas sp. CCMP768 CAMPEP0191546976  
Rhodopirellula baltica NP\_870325  
Rhodosorus sp. CAMPEP0184741054  
Rhodosorus sp. CAMPEP0184753238  
Saccharomyces cerevisiae YJL130C  
Saccharomyces cerevisiae YJR109C  
Salpingoeca rosetta EGD76319  
Shewanella halifaxensis YP\_001675367  
Sulfolobus solfataricus NP\_342159  
Tetraselmis sp. CAMPEP0200903730  
Thalassiosira pseudonana XP\_002289336  
Thalassiosira pseudonana XP\_002292735  
Theileria annulata XP\_954765  
Theileria parva XP\_763067  
Thermosynechococcus elongatus NP\_683122  
Thraustochytrium sp. LLF1b CAMPEP0193131092  
Thraustochytrium sp. LLF1b CAMPEP0193133550  
Toxoplasma gondii AAL27793  
Trichodesmium erythraeum YP\_722523  
Trichoplax adherens 29177  
Trypanosoma brucei CBH11387  
Vaucheria litorea CAMPEP0199153208  
Vaucheria litorea CAMPEP0199157910  
Vibrio vulnificus CMCP6  
Vitrella brassicaformis CEM14616  
Ochromonas sp. CCMP1393 CAMPEP0190276052  
Ostreococcus lucimarinus 13232  
Ostreococcus lucimarinus 28754  
Oxyrrhis marina CAMPEP0190328430  
Paulinella chromatophora ACB42582  
Pavlova sp. CCMP459 CAMPEP0190508088  
Pelagomonas calceolata CAMPEP0199691512  
Peridinium aciculiferum CAMPEP0190620402  
Phaeodactylum tricornutum XP\_002184453  
Phanerochaete chrysosporium 125524  
Phanerochaete chrysosporium 5965  
Phycomyces blakesleeanus 113947  
Phycomyces blakesleeanus 184165  
Physcomitrella patens 146128  
Physcomitrella patens 169569  
Phytophthora infestans XP\_002904952  
Phytophthora ramorum 49061  
Phytophthora ramorum 95147  
Phytophthora sojae 109166  
Phytophthora sojae 155409  
Picocystis sp. CAMPEP0190745440  
Plasmodium falciparum XP\_001350162  
Pleurochrysis carterae CAMPEP0190760360  
Populus trichocarpa 206001  
Populus trichocarpa 550113  
Populus trichocarpa 794796  
Porphyridium cruentum HS970446+HS695246  
Proboscia alata CAMPEP0200159054  
Prochlorococcus marinus YP\_001551191  
Prorocentrum minimum CAMPEP0191100692  
Prymnesium parvum CAMPEP0191200986  
Pyramimonas sp. CAMPEP0191494844  
Rattus norvegicus CAA26007  
Rattus norvegicus EDM02939  
Rhodella maculata CAMPEP0191514062  
Rhodobacter sphaeroides YP\_352060  
Rhodomonas sp. CCMP768 CAMPEP0191587138  
Rhodopirellula baltica NP\_867004  
Rhodosorus sp. CAMPEP0184744098  
Roseiflexus castenholzii YP\_001433145  
Saccharomyces cerevisiae NP\_012405  
Saccharomyces cerevisiae NP\_012447  
Scrippsiella trochoidea CAMPEP0191998236  
Shewanella halifaxensis YP\_001672921  
Shewanella halifaxensis YP\_001675259  
Sorangium cellulosum WP\_012239766  
Sulfolobus solfataricus NP\_342369  
Symbiodinium sp. Mp CAMPEP0192595932  
Tetraselmis sp. CAMPEP0200904340  
Thalassiosira pseudonana XP\_002286586  
Rhodobacter sphaeroides YP\_352689  
Rhodobacter sphaeroides YP\_352971  
Rhodomonas sp. CCMP768 CAMPEP0191588228  
Saccharomyces cerevisiae NP\_015214  
Scrippsiella trochoidea CAMPEP0192095212  
Selaginella moellendorffii 73545\_e\_gw1.0.671.1  
Shewanella halifaxensis YP\_001674029  
Sorangium cellulosum WP\_012232678  
Sorangium cellulosum WP\_012237032  
Sulfolobus solfataricus NP\_344052  
Thalassiosira pseudonana XP\_002296117  
Thraustochytrium sp. LLF1b CAMPEP0193130326  
Trichoplax adherens 52723  
Vibrio vulnificus NP\_761202  
Vibrio vulnificus NP\_936803  
Vitrella brassicaformis 27786.t1  
Vitrella brassicaformis 8209.t1

Thalassiosira pseudonana XP\_002291441  
Theileria annulata XP\_954289  
Theileria parva XP\_765996  
Thermococcus kodakarensis YP\_183284  
Thermoplasma acidophilum NP\_394049  
Thermoplasma acidophilum NP\_394786  
Thermosynechococcus elongatus NP\_681897  
Thraustochytrium sp. LLF1b CAMPEP0193140552  
Trichodesmium erythraeum YP\_721117  
Trichomonas vaginalis XP\_001301097  
Trichoplax adherens 29177  
Trypanosoma brucei XP\_845052  
Vaucheria litorea CAMPEP0199158548  
Vibrio vulnificus NP\_760377  
Vibrio vulnificus NP\_760378  
Vitrella brassicaformis 781.t1
